# Supplementary material for: The use of neuralgia medications to treat sensory neuropathic cough: our experience in a retrospective cohort of thirty-two patients
Source: PeerJ. 2015 Mar 3;3:e816. doi: 10.7717/peerj.816 (PMC4358635; doi:10.7717/peerj.816)
Supplement: Supplemental Information 1 [file peerj-03-816-s001.xlsx]

## Sheet: Sheet1
Age	Gender	Duration of cough (months)	Respiratory tract infection prior to cough (yes/no)	Kind of sensory disturbance	Location of sensory disturbance (lx=larynx, sn=sternal notch)	Laterality (midline, left, or right)	Cough trigger 1	Trigger 2	Trigger 3	Med 1	Med 1 dose	Med 1 % Reduction of symptoms (ROS)	Med 2	Med 2 dose	Med 2 %ROS	Med 3	Med 3 dose	Med 3 %ROS	Final med	Final %ROS	Physical response to coughing 1	2	3	4	5	6	Number of minor episodes/day	Number of major episodes/day	Total episodes/day	Nighttime episodes? (yes/no)	Laryngospasms? (yes/no)	Demonstrable motor neuropathy
23	F	120	n	mucus	lx	m	talk	sing		A	50	100							A	100							10	0	10	n	n
26	F	60	y	tickle						A	40	100							A	100							200	0	200	n	n
33	F	48	y		sn	m	cold air	laugh	warm air	A	100	90							A	90(*only eliminated nighttime episodes: prev awakened 5x/week with cough)	almost throw up	urine					30	20	50	y	n
37	F	48	y	tickle	sn	m				A	50	0	D	50	0				D	0	red	eyes	nose	throw up	urine	chest wall pain	70	30	100	n	n
44	F	432	y	powdered donut	lx + sn + trach	m				A	10	85							A	85	red	nose	urine				0	20	20
45	M	168	n	tickle	lx	m	talk	cold		A	10	60							A	60							100	0	100	n	n
51	M	180	n	irritation	sn + lx	m	position	warm		A	80	100							A	100	head explodes						6	0	6	n	y	instability
53	F	48	n	tickle	lx	m	talk	laugh	sing	A	80	90							A	90	nose	nearly throw up	urine				70	5	75	n	n
54	F	204	n	tickle	sn		talk	laugh	cold	D	10	20							D	20	red	eyes	nose	almost throw			97	3	100	n	n
56	M	12	n	throat clear needed	hy	m				A	40	0	G	3600	50				G	50	red	gag	almost throw				197	3	200	n	n
56	F	20	y	root canal'	lx	m	eat			A	20	50							A	50	red						150	0	150	n	n
57	F	18	n	chest pressure	high central	m	talk	cold	posture	A	40	0	G	600	90				G	90							3	17	20	n	n
57	F	432	y	tickle	lx	m	eat			A	20	50							A	50	eyes	nose	urine				100	0	100	n	y
58	F	30	y	tickle	sn	m	laugh	posture		A	50	85							A	85							100	0.5	100.5	y	y
61	F	180	n	tightening	sn	m	cold	talk	sing	D	100	85							D	85	eyes	nose	throw	urine			43	7	50	y	n
63	F	240	y	tickle	sn	m	laugh	cold air	pressure	A	20	50	D	30	0	G	900	80	G	80	red	eyes	nose	throw	pass	urine	190	10	200	y	n	quiver and instability
63	F	18	n	tickle	lx	m	talk	laugh		D	10	100							D	100	red	urine					25	50	75	n	y	quiver and instability
63	M	5	y	tickle	sn	m	eat			A	20	90							A	90							0	1	1
66	F	264	n	tickle	sn	m	laugh	cold	odors	A	40	50							A	50	nose	almost throw	popped blood vessel				70	30	100	n	n	quivering on inspiration
66	F	204	n	tickle	lx	m	talk	posture		A	80	50	G	2400	50	G + A	2400 + 80	25	G + A	25	red	eyes	almost throw up	urine			70	5	75	y	n
68	F	48	y	tickle	lx	L	posture	touch		G	2400	80							G	80	eyes	nose	urine				50	50	100	y	n	quiver and asymmetry
68	M	60	n	tickle	sn	m	touch			D	80	70	G	1800	50				G	50							49	1	50	y	n
68	F	240	n	tickle	sn	m	talk			D	20	0	G	1500	75				G	75							17	3	20	y	n
68	M	60	y	tickle, crumb	sn	m	talk	laugh	sing	D	80	70	G	1800	70				G	70							25	?	25	n	n
72	F	168	n	tickle	lx	m	talk	eat	posture	D	80	50	G	900	0				D	50	red						197	3	200	y	n
72	M	24	n	tickle	lx	r	eat			D	40	100							D	100	nose	throw	nearly pass out				25	4	29	n	n
73	F	60	n	tickle	sn	m	talk	sing	cold	D	10	0	G	1200	50				G	50	red	eyes	nose	urine	flatus		0	3	3	n	n
74	F	24	n	tickle			talk			D	20	85							D	85	nose	almost throw up					5	5	10	n	n	pre-existing vocal fold paralysis
76	F	8	n	tickle	sn	m	talk	laugh	sing	D	20	75							D	75	eyes	nose	throw	nearly pass out			47	0.5	47.5	n	y
78	F	60	n	tickle	sn	m	swallow	talk	sing	D	20	65	G	900	75				G	75	almost throw	urine					40	10	50	n	n
80	M	11	n	none			none			A	25	0	G	1200	0	capsaicin	4x	80	capsaicin	80	pass out						98	2	100	n	n
80	F	144	y	vague			cold			D	30	85							D	85	urine						100	0	100
